# Supplementary material for: The concurrence of Atmospheric Rivers and explosive cyclogenesis inthe North Atlantic and North Pacific basins
Source: Copernicus journal article supplement (doi:10.5194/esd-2017-76), 2017-08-22
Supplement: Supplementary file 1 [file esd-2017-76-supplement.pdf]

# **The concurrence of Atmospheric Rivers and explosive cyclogenesis in the North Atlantic and North Pacific basins**

Jorge Eiras-Barca<sup>1</sup>, Alexandre M. Ramos<sup>2\*</sup>, Joaquim G. Pinto<sup>3</sup>, Ricardo M. Trigo<sup>2</sup>, Margarida L.R. Liberato<sup>2,3</sup>, and Gonzalo Miguez-Macho<sup>1</sup>

<sup>1</sup> Non-Linear Physics Group, Universidade de Santiago de Compostela, Galicia, Spain

<sup>2</sup> Instituto Dom Luiz, Faculdade de Ciências, Universidade de Lisboa, Lisbon, Portugal;

<sup>3</sup> Institute for Meteorology and Climate Research (IMK-TRO), Karlsruhe Institute of Technology (KIT), Karlsruhe, Germany

<sup>4</sup> Escola de Ciências e Tecnologia, Universidade de Trás-os-Montes e Alto Douro, Vila Real, Portugal.

## **Supplementary Material**

## Supplementary Table

**Table S1.** The number of explosive cyclones (EC) and non-explosive cyclones (NEC) used for each time step in the computation of Figure 3 to 5 and S1, S3 and to S4 for the North Atlantic domain (a) and for the North Pacific domain (b).

**a)**

| North Atlantic | Step (h) | Events | North Atlantic | Step (h) | Events |
|----------------|----------|--------|----------------|----------|--------|
| EC             | -36      | 309    | NEC            | -36      | 1918   |
| EC             | -30      | 387    | NEC            | -30      | 2545   |
| EC             | -24      | 527    | NEC            | -24      | 3988   |
| EC             | -18      | 733    | NEC            | -18      | 7315   |
| EC             | -12      | 733    | NEC            | -12      | 7315   |
| EC             | -6       | 733    | NEC            | -6       | 7315   |
| EC             | 0        | 733    | NEC            | 0        | 7315   |
| EC             | 6        | 733    | NEC            | 6        | 7315   |
| EC             | 12       | 669    | NEC            | 12       | 6012   |
| EC             | 18       | 619    | NEC            | 18       | 5051   |
| EC             | 24       | 566    | NEC            | 24       | 4361   |
| EC             | 30       | 505    | NEC            | 30       | 3770   |
| EC             | 36       | 441    | NEC            | 36       | 2895   |

**b)**

| North Pacific | Step (h) | Events | North Pacific | Step (h) | Events |
|---------------|----------|--------|---------------|----------|--------|
| EC            | -36      | 486    | NEC           | -36      | 2616   |
| EC            | -30      | 641    | NEC           | -30      | 3619   |
| EC            | -24      | 835    | NEC           | -24      | 5706   |
| EC            | -18      | 1115   | NEC           | -18      | 10890  |
| EC            | -12      | 1115   | NEC           | -12      | 10890  |
| EC            | -6       | 1115   | NEC           | -6       | 10890  |
| EC            | 0        | 1115   | NEC           | 0        | 10890  |
| EC            | 6        | 1115   | NEC           | 6        | 10890  |
| EC            | 12       | 1031   | NEC           | 12       | 8812   |
| EC            | 18       | 960    | NEC           | 18       | 7402   |
| EC            | 24       | 898    | NEC           | 24       | 6336   |
| EC            | 30       | 836    | NEC           | 30       | 5496   |
| EC            | 36       | 744    | NEC           | 36       | 4115   |

## Supplementary Figures

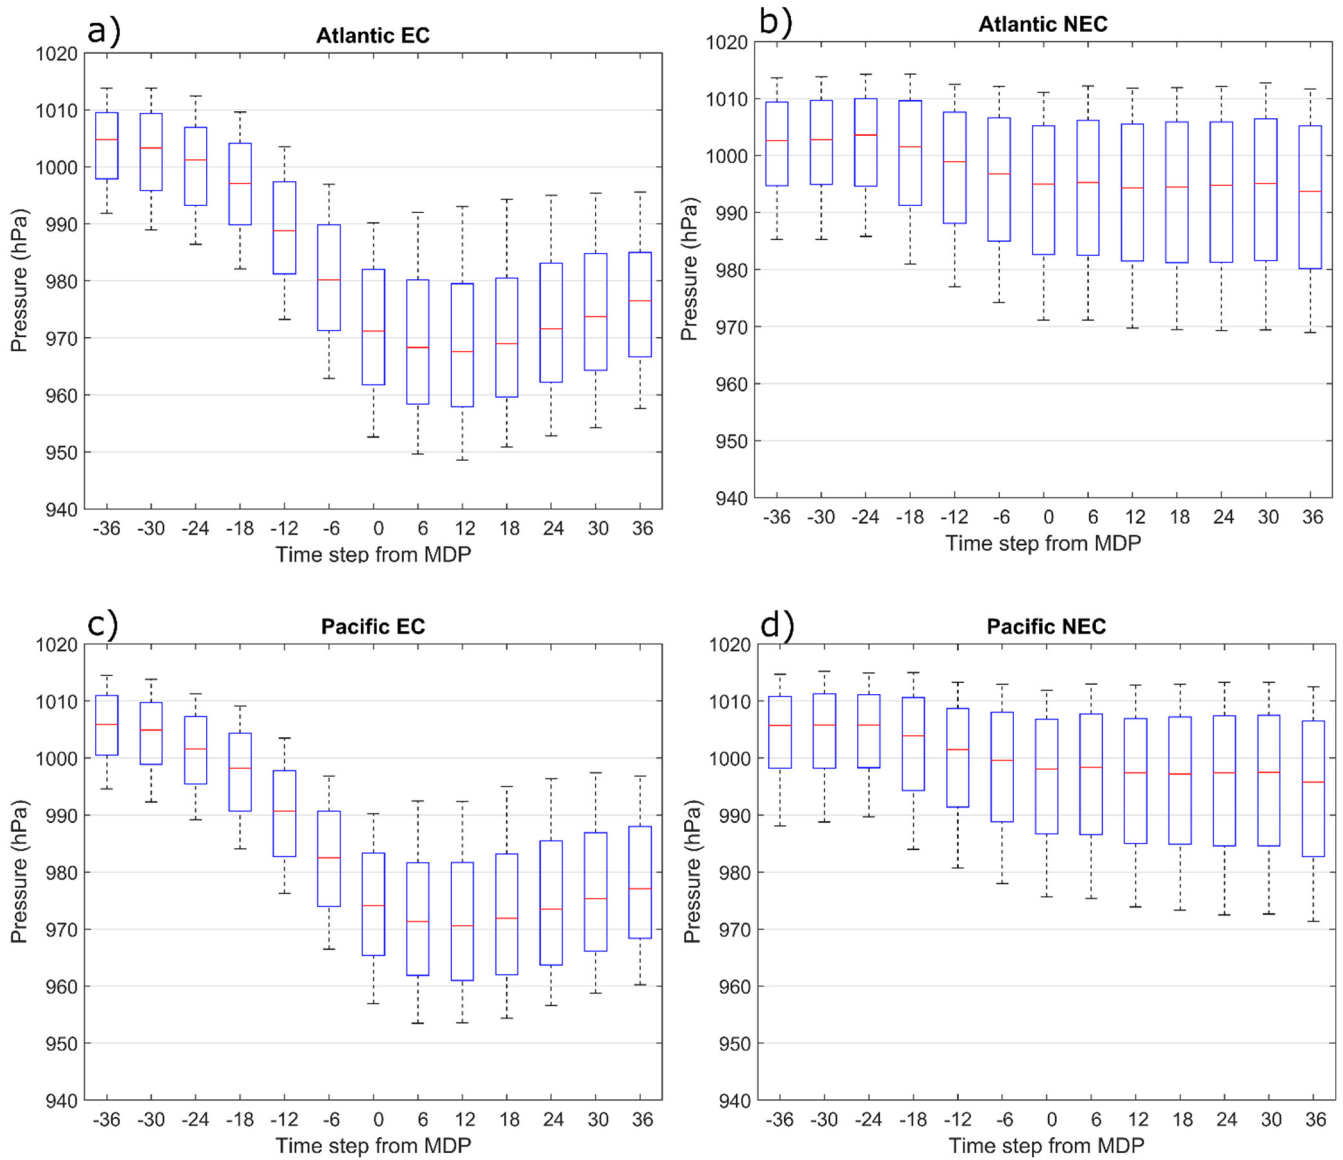

**Figure S1.** Distribution of core pressure values (a) for explosive cyclogenesis (EC) and the North Atlantic. Data is depicted as box-plots with the median (red line), 10<sup>th</sup>, 25<sup>th</sup>, 75<sup>th</sup> and 90<sup>th</sup> percentiles of the distributions of cyclone core pressure in every time step from -36h until +36h. Number of samples is indicated in Table S1. (b) as for a) but for Non-explosive cyclogenesis (NEC) (c) as a) but for North Pacific. (d) as b) but for North Pacific.

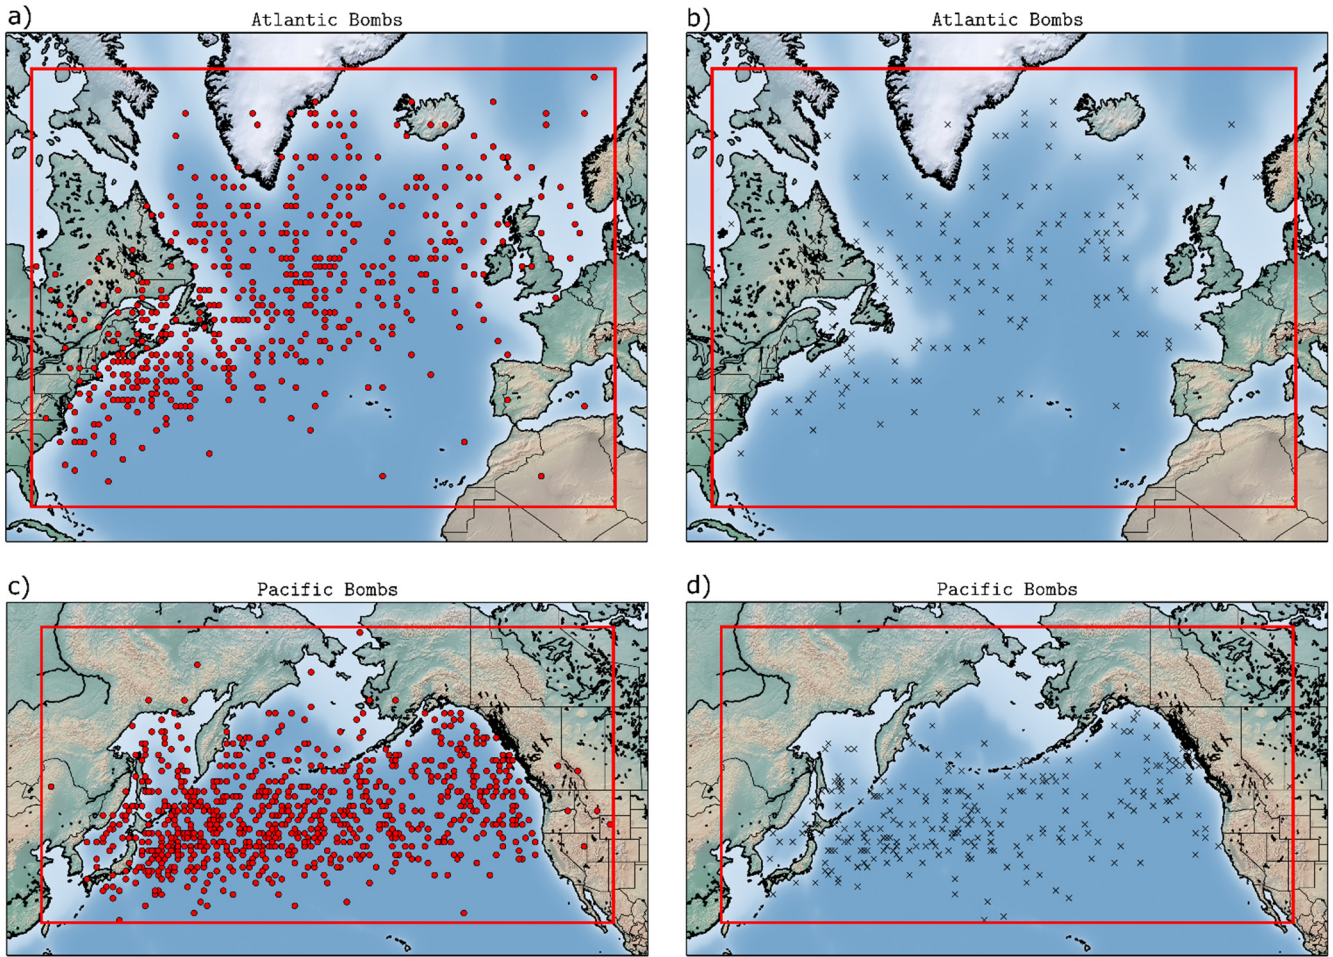

**Figure S2.** Location of explosive cyclogenesis (EC) during the maximum deepening point (MDP) (a) concurrent with an AR for the North Atlantic (red dots) (b) as a) but AR was not detected (black crosses) (c) as a) but for North Pacific (d) as b) but for North Pacific.

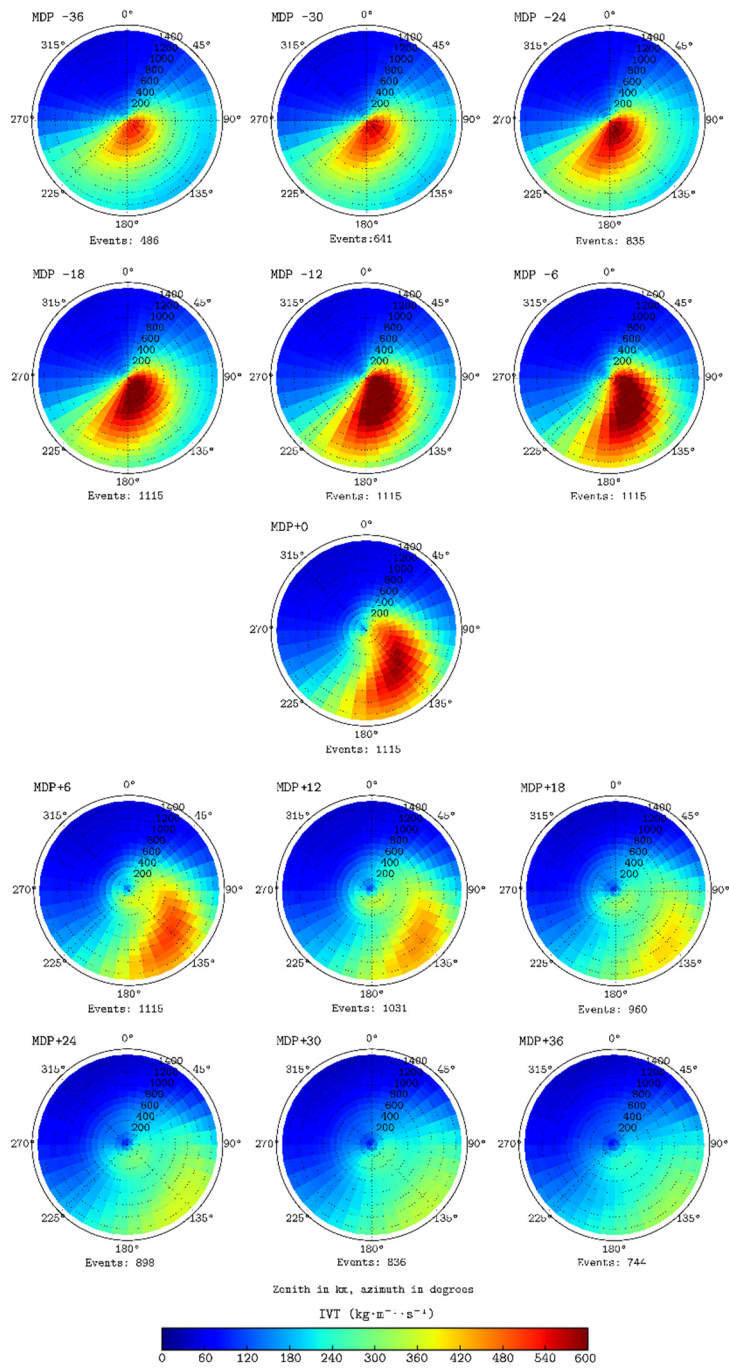

**Figure S3.** Composite of the integrated vapour transport (IVT, colours,  $\text{kg}\cdot\text{m}^{-1}\cdot\text{s}^{-1}$ ) within a 1500km radius around the cyclone core of an explosive cyclogenesis (EC) cyclone for the North Pacific basin for the period 1979-2011. The maximum deepening point (MDP) is fixed as time-reference and results are shown for  $\pm 36$  hours of the MDP.

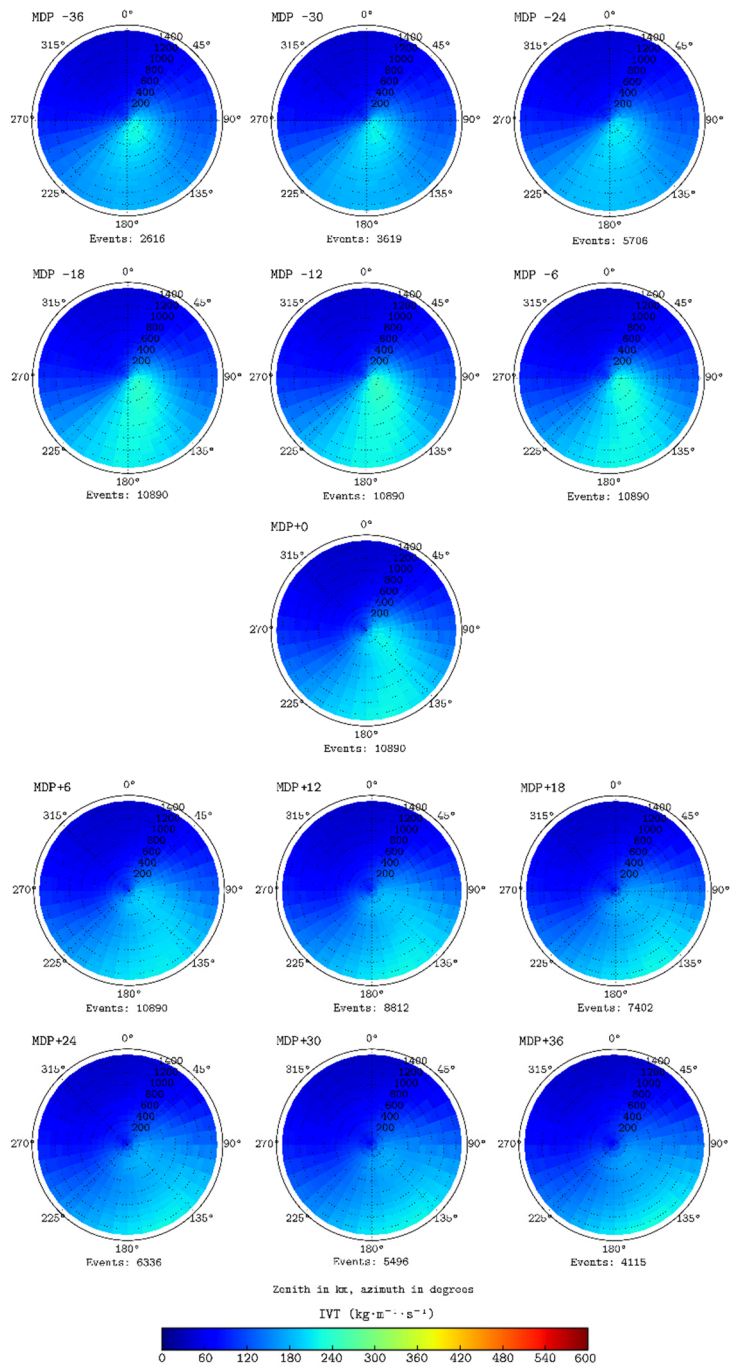

**Figure S4.** Same as Figure S3, but for Non-Explosive cyclogenesis (NEC).
